# Supplementary material for: Revisiting 2-chloro-4-nitroaniline: analysis of intricate supramolecular ordering of a triclinic polymorph featuring a highZvalue and strong second harmonic generation
Source: Royal Society of Chemistry journal article supplement (doi:10.1039/d0ce00582g), 2020-01-01
Supplement: d0ce00582g1.pdf [file d0ce00582g1.pdf]

# Revisiting 2-chloro-4-nitroaniline: analysis of intricate supramolecular ordering of a triclinic polymorph featuring high *Z* value and strong second harmonic generation

Volodymyr Medviediev,<sup>1</sup> Svitlana Shishkina,<sup>2,3</sup> A. O. Ribalka,<sup>3</sup>

Jan K. Zaręba,<sup>4</sup> Marek Drozd,<sup>1</sup> Marek Daszkiewicz<sup>1</sup>

<sup>1</sup>*Institute of Low Temperature and Structure Research, Polish Academy of Sciences, Okólna str. 2, 50-422 Wrocław, Poland*

<sup>2</sup>*SSI “Institute for Single Crystals”, National Academy of Science of Ukraine, 60 Nauky Ave., Kharkiv 61001, Ukraine*

<sup>3</sup>*V. N. Karazin Kharkiv National University, 4 Svobody sq., Kharkiv 61077, Ukraine*

<sup>4</sup>*Advanced Materials Engineering and Modelling Group, Faculty of Chemistry, Wrocław University of Science and Technology, Wybrzeże Wyspiańskiego 27, 50-370 Wrocław, Poland*

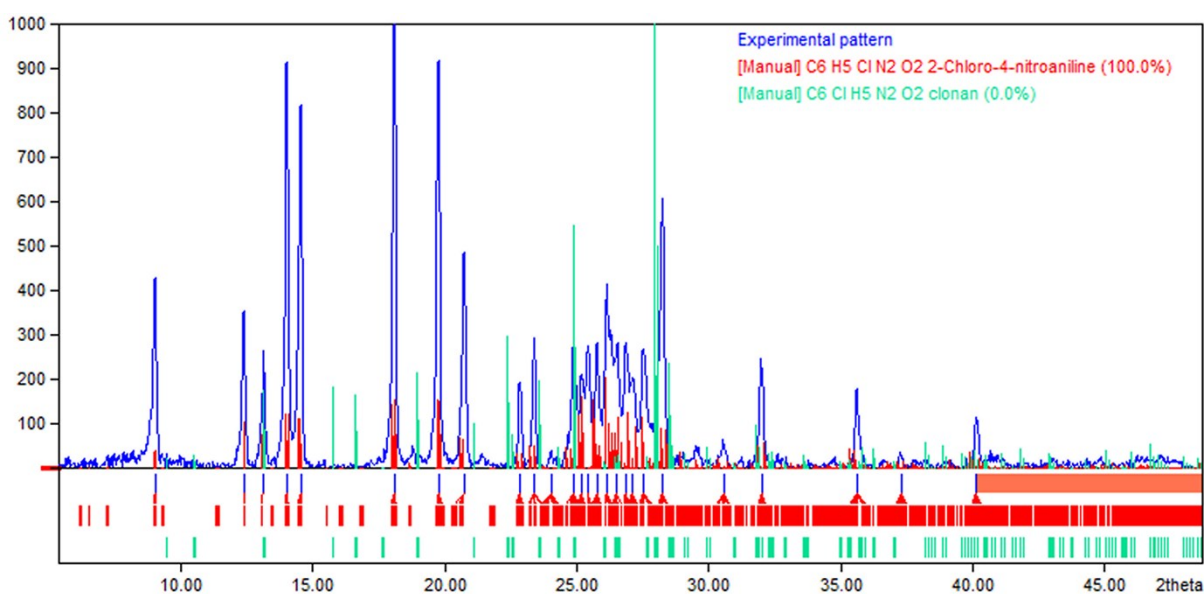

Figure S1. X-ray powder diffraction pattern for the triclinic phase of 2Cl4na re-crystallized from aqueous ethanol (blue), theoretical pattern generated on the basis of X-ray data for single-crystal of triclinic form (red) and pattern generated on the basis of data for orthorhombic phase deposited in the *Cambridge Structural Database* (green).

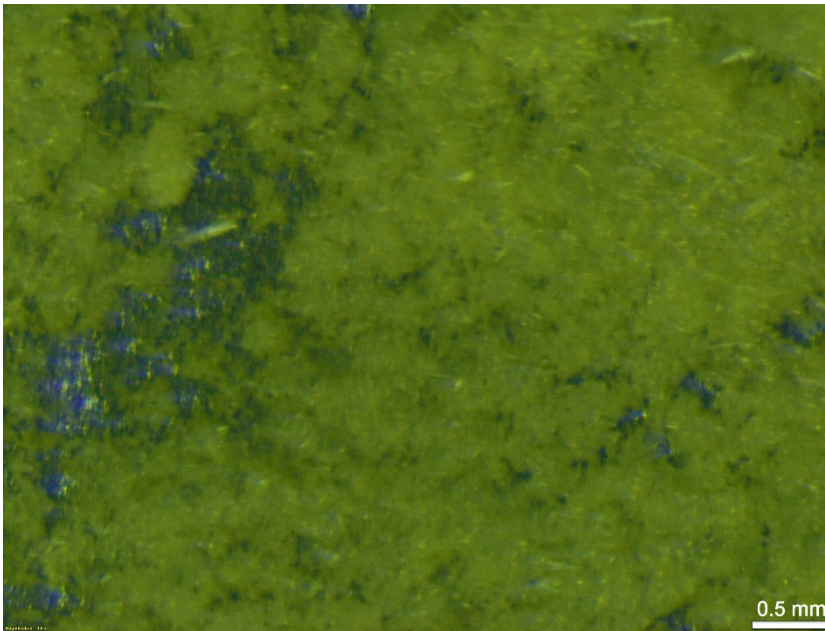

Figure S2. A photo of the microcrystalline sample of triclinic polymorph measured by XRD powder diffractometer.

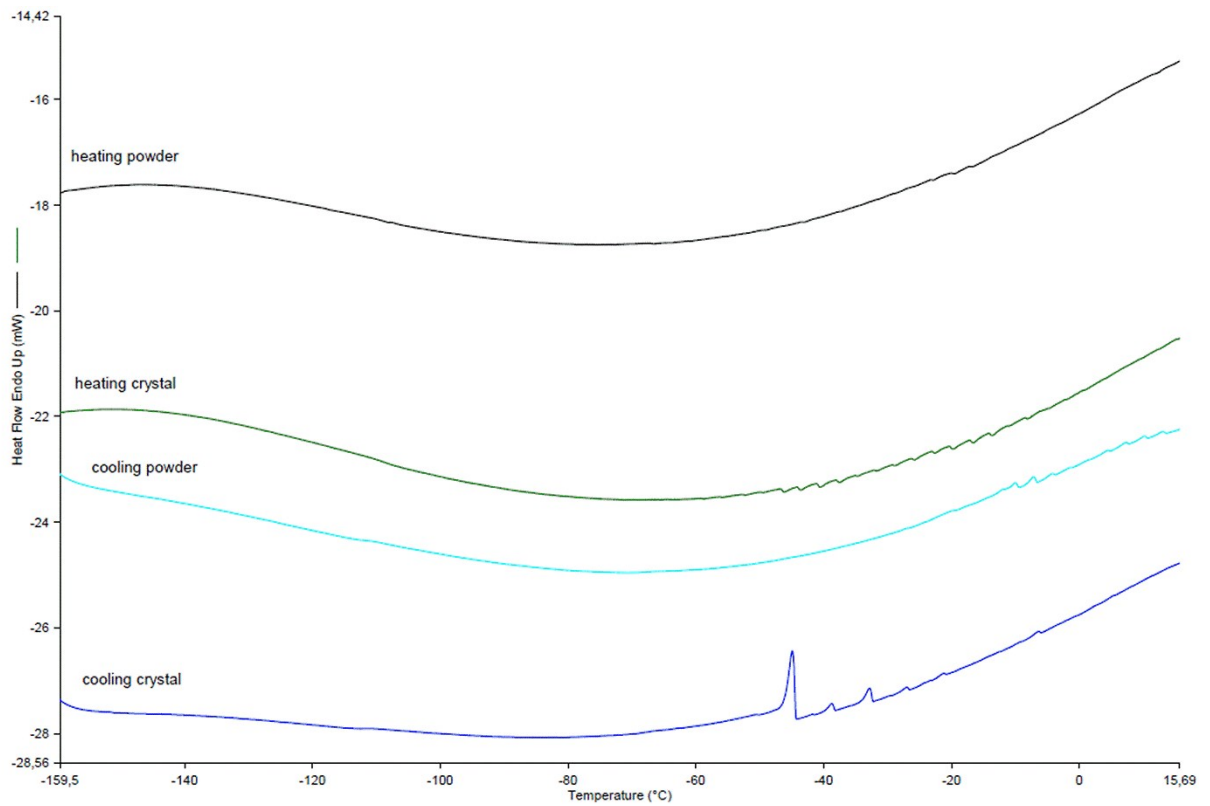

Figure S3. DSC curves for the bulk re-crystallized sample and for a few selected needles of the triclinic polymorph.

Table S1. Symmetry codes, bonding type, interaction energy of the basic building unit with neighbouring ones ( $E_{\text{int}}$ , kcal/mol) and the contribution of this energy to the total interaction energy (%) in the orthorhombic crystal of 2Cl4na.

| Dimer                       | Symmetry operation    | $E_{\text{int}}$ | Contribution | Interaction     |
|-----------------------------|-----------------------|------------------|--------------|-----------------|
| Building unit is a molecule |                       |                  |              |                 |
| o1                          | $x,y,1+z$             | -6.10            | 12.8         | stacking        |
| o2                          | $x,y,-1+z$            | -6.10            | 12.8         | stacking        |
| o3                          | $1/2-x,-1/2+y,1/2+z$  | -4.75            | 10.0         | N-H $\cdots$ O  |
| o4                          | $1/2-x,1/2+y,-1/2+z$  | -4.75            | 10.0         | N-H $\cdots$ O  |
| o5                          | $-1/2+x,1/2-y,-1+z$   | -3.80            | 8.0          | non-specific    |
| o6                          | $1/2+x,1/2-y,1+z$     | -3.80            | 8.0          | non-specific    |
| o7                          | $1-x,1-y,1/2+z$       | -3.52            | 7.4          | C-H $\cdots$ Cl |
| o8                          | $1-x,1-y,-1/2+z$      | -3.52            | 7.4          | C-H $\cdots$ Cl |
| o9                          | $1/2+x,1/2-y,z$       | -2.50            | 5.3          | non-specific    |
| o10                         | $-1/2+x,1/2-y,z$      | -2.50            | 5.3          | non-specific    |
| o11                         | $1/2-x,1/2+y,1/2+z$   | -1.62            | 3.4          | non-specific    |
| o12                         | $1/2-x,-1/2+y,-1/2+z$ | -1.62            | 3.4          | non-specific    |
| o13                         | $-x,1-y,1/2+z$        | -1.52            | 3.2          | N-H $\cdots$ N  |
| o14                         | $-x,1-y,-1/2+z$       | -1.52            | 3.2          | N-H $\cdots$ N  |

Table S2. Symmetry codes, bonding type, interaction energy of the basic building unit with neighbouring ones ( $E_{\text{int}}$ , kcal/mol) and the contribution of this energy to the total interaction energy (%) in the triclinic crystal of 2Cl4na.

| Dimer | Mol. | Symmetry operation | $E_{\text{int}}$ | Contribution | Interaction                                  |
|-------|------|--------------------|------------------|--------------|----------------------------------------------|
| tA1   | B    | $-1+x,y,z$         | -7.51            | 14.2         | N-H $\cdots$ O <sup>b</sup> , C-H $\cdots$ O |
| tA2   | A    | $1+x,y,z$          | -6.25            | 11.9         | stacking                                     |
| tA3   | A    | $-1+x,y,z$         | -6.25            | 11.9         | stacking                                     |
| tA4   | D    | $x,y,-1+z$         | -6.07            | 11.5         | N-H $\cdots$ O <sup>b</sup>                  |
| tA5   | G    | $x,y,z$            | -5.36            | 10.2         | N-H $\cdots$ O                               |
| tA6   | G    | $-1+x,-1+y,z$      | -5.18            | 9.8          | N-H $\cdots$ O, C-H $\cdots$ Cl              |
| tA7   | G    | $-1+x,y,z$         | -3.78            | 7.2          | C-H $\cdots$ O                               |
| tA8   | D    | $-1+x,y,-1+z$      | -2.99            | 5.7          | non-specific                                 |
| tA9   | H    | $-1+x,-1+y,z$      | -2.88            | 5.5          | non-specific                                 |
| tA10  | H    | $x,-1+y,z$         | -2.81            | 5.3          | C-H $\cdots$ Cl                              |
| tA11  | G    | $x,-1+y,z$         | -2.57            | 4.9          | non-specific                                 |
| tA12  | B    | $x,y,z$            | -2.30            | 4.4          | non-specific                                 |
| tA13  | H    | $-1+x,y,z$         | 1.23             | -2.3         | non-specific                                 |
|       |      | Total              | -45.23           |              |                                              |

Table S3. Symmetry codes, bonding type, interaction energy of the basic building unit with neighbouring ones ( $E_{\text{int}}$ , kcal/mol) and the contribution of this energy to the total interaction energy (%) in the triclinic crystal of 2Cl4na (molecule B).

| Dimer | Mol. | Symmetry operation | $E_{\text{int}}$ | Contribution | Interaction                                  |
|-------|------|--------------------|------------------|--------------|----------------------------------------------|
| tB1   | A    | 1+x,y,z            | -7.51            | 13.9         | N-H $\cdots$ O <sup>b</sup> , C-H $\cdots$ O |
| tB2   | C    | -1+x,y,z           | -6.94            | 12.9         | N-H $\cdots$ O                               |
| tB3   | F    | -1+x,y,z           | -5.68            | 10.5         | N-H $\cdots$ O, C-H $\cdots$ Cl              |
| tB4   | B    | -1+x,y,z           | -5.58            | 10.4         | stacking                                     |
| tB5   | B    | 1+x,y,z            | -5.58            | 10.4         | stacking                                     |
| tB6   | F    | 1+x,-1+y,z         | -5.21            | 9.7          | N-H $\cdots$ O                               |
| tB7   | F    | x,y,z              | -3.97            | 7.4          | non-specific                                 |
| tB8   | G    | x,y,z              | -3.29            | 6.1          | C-H $\cdots$ Cl                              |
| tB9   | F    | x,-1+y,z           | -3.22            | 6.0          | non-specific                                 |
| tB10  | G    | -1+x,y,z           | -3.07            | 5.7          | C-H $\cdots$ Cl                              |
| tB11  | C    | x,y,z              | -2.71            | 5.0          | C-H $\cdots$ O                               |
| tB12  | A    | x,y,z              | -2.30            | 4.3          | non-specific                                 |
| tB13  | G    | x,-1+y,z           | 1.16             | -2.1         | non-specific                                 |
|       |      | Total              | -46.39           |              |                                              |

Table S4. Symmetry codes, bonding type, interaction energy of the basic building unit with neighbouring ones ( $E_{\text{int}}$ , kcal/mol) and the contribution of this energy to the total interaction energy (%) in the triclinic crystal of 2Cl4na (molecule C).

| Dimer | Mol. | Symmetry operation | $E_{\text{int}}$ | Contribution | Interaction                     |
|-------|------|--------------------|------------------|--------------|---------------------------------|
| tC1   | B    | 1+x,y,z            | -6.94            | 13.3         | N-H $\cdots$ O                  |
| tC2   | D    | -1+x,y,z           | -6.12            | 11.7         | N-H $\cdots$ O, C-H $\cdots$ O  |
| tC3   | C    | -1+x,y,z           | -5.77            | 11.1         | stacking                        |
| tC4   | C    | 1+x,y,z            | -5.77            | 11.1         | stacking                        |
| tC5   | E    | x,-1+y,z           | -5.71            | 11.0         | N-H $\cdots$ O                  |
| tC6   | E    | 1+x,y,z            | -5.67            | 10.9         | N-H $\cdots$ O, C-H $\cdots$ Cl |
| tC7   | E    | 1+x,-1+y,z         | -3.78            | 7.2          | non-specific                    |
| tC8   | F    | 1+x,-1+y,z         | -2.92            | 5.6          | C-H $\cdots$ Cl                 |
| tC9   | F    | x,-1+y,z           | -2.72            | 5.2          | C-H $\cdots$ Cl                 |
| tC10  | B    | x,y,z              | -2.71            | 5.2          | C-H $\cdots$ O                  |
| tC11  | E    | x,y,z              | -2.67            | 5.1          | non-specific                    |
| tC12  | D    | x,y,z              | -2.53            | 4.9          | non-specific                    |
| tC13  | F    | x,y,z              | 1.20             | -2.3         | non-specific                    |
|       |      | Total              | -45.18           |              |                                 |

Table S5. Symmetry codes, bonding type, interaction energy of the basic building unit with neighbouring ones ( $E_{\text{int}}$ , kcal/mol) and the contribution of this energy to the total interaction energy (%) in the triclinic crystal of o-2Cl4na (molecule D).

| Dimer | Mol. | Symmetry operation | $E_{\text{int}}$ | Contribution | Interaction                                  |
|-------|------|--------------------|------------------|--------------|----------------------------------------------|
| tD1   | C    | 1+x,y,z            | -6.12            | 12.1         | N-H $\cdots$ O, C-H $\cdots$ O               |
| tD2   | A    | x,y,1+z            | -6.07            | 12.0         | N-H $\cdots$ O <sup>b</sup> , C-H $\cdots$ O |
| tD3   | D    | 1+x,y,z            | -6.03            | 11.9         | stacking                                     |
| tD4   | D    | -1+x,y,z           | -6.03            | 11.9         | stacking                                     |
| tD5   | H    | -1+x,y,1+z         | -5.34            | 10.6         | N-H $\cdots$ O                               |
| tD6   | H    | 1+x,-1+y,1+z       | -5.13            | 10.1         | N-H $\cdots$ O                               |
| tD7   | H    | x,y,1+z            | -3.02            | 6.0          | non-specific                                 |
| tD8   | H    | x,-1+y,1+z         | -3.00            | 5.9          | non-specific                                 |
| tD9   | A    | 1+x,y,1+z          | -2.99            | 5.9          | non-specific                                 |
| tD10  | E    | 1+x,y,z            | -2.83            | 5.6          | non-specific                                 |
| tD11  | E    | x,y,z              | -2.79            | 5.5          | C-H $\cdots$ Cl                              |
| tD12  | C    | x,y,z              | -2.53            | 5.0          | non-specific                                 |
| tD13  | E    | 1+x,-1+y,z         | 1.29             | -2.5         | non-specific                                 |
|       |      | Total              | -44.47           |              |                                              |

Table S6. Symmetry codes, bonding type, interaction energy of the basic building unit with neighbouring ones ( $E_{\text{int}}$ , kcal/mol) and the contribution of this energy to the total interaction energy (%) in the triclinic crystal of 2Cl4na (molecule E).

| Dimer | Mol. | Symmetry operation | $E_{\text{int}}$ | Contribution | Interaction                                  |
|-------|------|--------------------|------------------|--------------|----------------------------------------------|
| tE1   | F    | $-1+x,y,z$         | -7.06            | 13.3         | N-H $\cdots$ O <sup>b</sup> , C-H $\cdots$ O |
| tE2   | H    | $x,y,1+z$          | -6.61            | 12.5         | N-H $\cdots$ O, C-H $\cdots$ O               |
| tE3   | E    | $1+x,y,z$          | -5.87            | 11.1         | stacking                                     |
| tE4   | E    | $-1+x,y,z$         | -5.87            | 11.1         | stacking                                     |
| tE5   | C    | $x,1+y,z$          | -5.71            | 10.8         | N-H $\cdots$ O                               |
| tE6   | C    | $-1+x,y,z$         | -5.67            | 10.7         | N-H $\cdots$ O, C-H $\cdots$ Cl              |
| tE7   | C    | $-1+x,1+y,z$       | -3.78            | 7.1          | non-specific                                 |
| tE8   | H    | $-1+x,y,1+z$       | -3.09            | 5.8          | non-specific                                 |
| tE9   | D    | $-1+x,y,z$         | -2.83            | 5.3          | non-specific                                 |
| tE10  | D    | $x,y,z$            | -2.79            | 5.3          | C-H $\cdots$ Cl                              |
| tE11  | C    | $x,y,z$            | -2.67            | 5.0          | non-specific                                 |
| tE12  | F    | $x,y,z$            | -2.36            | 4.5          | non-specific                                 |
| tE13  | D    | $-1+x,1+y,z$       | 1.29             | -2.4         | non-specific                                 |
|       |      |                    | -45.96           |              |                                              |



Table S7. Symmetry codes, bonding type, interaction energy of the basic building unit with neighbouring ones ( $E_{\text{int}}$ , kcal/mol) and the contribution of this energy to the total interaction energy (%) in the triclinic crystal of 2Cl4na (molecule F).

| Dimer | Mol. | Symmetry operation | $E_{\text{int}}$ | Contribution | Interaction                                  |
|-------|------|--------------------|------------------|--------------|----------------------------------------------|
| tF1   | G    | $-1+x,y,z$         | -7.32            | 13.7         | N-H $\cdots$ O                               |
| tF2   | E    | $1+x,y,z$          | -7.06            | 13.2         | N-H $\cdots$ O <sup>b</sup> , C-H $\cdots$ O |
| tF3   | F    | $-1+x,y,z$         | -6.00            | 11.2         | stacking                                     |
| tF4   | F    | $1+x,y,z$          | -6.00            | 11.2         | stacking                                     |
| tF5   | B    | $1+x,y,z$          | -5.68            | 10.6         | N-H $\cdots$ O                               |
| tF6   | B    | $-1+x,1+y,z$       | -5.21            | 9.8          | non-specific                                 |
| tF7   | B    | $x,y,z$            | -3.97            | 7.4          | non-specific                                 |
| tF8   | B    | $x,1+y,z$          | -3.22            | 6.0          | non-specific                                 |
| tF9   | C    | $-1+x,1+y,z$       | -2.92            | 5.5          | C-H $\cdots$ Cl                              |
| tF10  | C    | $x,1+y,z$          | -2.72            | 5.1          | C-H $\cdots$ Cl                              |
| tF11  | E    | $x,y,z$            | -2.36            | 4.4          | non-specific                                 |
| tF12  | G    | $x,y,z$            | -2.11            | 3.9          | non-specific                                 |
| tF13  | C    | $x,y,z$            | 1.20             | -2.2         | non-specific                                 |
|       |      | Total              | -46.04           |              |                                              |

Table S8. Symmetry codes, bonding type, interaction energy of the basic building unit with neighbouring ones ( $E_{\text{int}}$ , kcal/mol) and the contribution of this energy to the total interaction energy (%) in the triclinic crystal of 2Cl4na (molecule G).

| Dimer | Mol. | Symmetry operation | $E_{\text{int}}$ | Contribution | Interaction       |
|-------|------|--------------------|------------------|--------------|-------------------|
| tG1   | F    | 1+x,y,z            | -7.32            | 14.1         | N-H...O           |
| tG2   | H    | -1+x,y,z           | -6.13            | 11.8         | N-H...O           |
| tG3   | G    | -1+x,y,z           | -5.81            | 11.2         | stacking          |
| tG4   | G    | 1+x,y,z            | -5.81            | 11.2         | stacking          |
| tG5   | A    | x,y,z              | -5.36            | 10.3         | N-H...O           |
| tG6   | A    | 1+x,1+y,z          | -5.18            | 10.0         | N-H...O, C-H...Cl |
| tG7   | A    | 1+x,y,z            | -3.78            | 7.3          | non-specific      |
| tG8   | B    | x,y,z              | -3.29            | 6.3          | C-H...Cl          |
| tG9   | B    | 1+x,y,z            | -3.07            | 5.9          | C-H...Cl          |
| tG10  | A    | x,1+y,z            | -2.57            | 5.0          | non-specific      |
| tG11  | H    | x,y,z              | -2.57            | 5.0          | non-specific      |
| tG12  | F    | x,y,z              | -2.11            | 4.1          | non-specific      |
| tG13  | B    | x,1+y,z            | 1.16             | -2.2         | non-specific      |
|       |      |                    | -51.84           |              |                   |

Table S9. Symmetry codes, bonding type, interaction energy of the basic building unit with neighbouring ones ( $E_{\text{int}}$ , kcal/mol) and the contribution of this energy to the total interaction energy (%) in the triclinic crystal of o-2Cl4na (molecule H).

| Dimer | Mol. | Symmetry operation | $E_{\text{int}}$ | Contribution | Interaction                 |
|-------|------|--------------------|------------------|--------------|-----------------------------|
| tH1   | E    | $x,y,-1+z$         | -6.61            | 12.8         | N-H $\cdots$ O <sup>b</sup> |
| tH2   | G    | $1+x,y,z$          | -6.13            | 11.9         | N-H $\cdots$ O              |
| tH3   | H    | $-1+x,y,z$         | -6.05            | 11.8         | stacking                    |
| tH4   | H    | $1+x,y,z$          | -6.05            | 11.8         | stacking                    |
| tH5   | D    | $1+x,y,-1+z$       | -5.34            | 10.4         | N-H $\cdots$ O              |
| tH6   | D    | $-1+x,1+y,-1+z$    | -5.13            | 10.0         | N-H $\cdots$ O              |
| tH7   | E    | $1+x,y,-1+z$       | -3.09            | 6.0          | non-specific                |
| tH8   | D    | $x,y,-1+z$         | -3.02            | 5.9          | non-specific                |
| tH9   | D    | $x,1+y,-1+z$       | -3.00            | 5.8          | non-specific                |
| tH10  | A    | $1+x,1+y,z$        | -2.88            | 5.6          | non-specific                |
| tH11  | A    | $x,1+y,z$          | -2.81            | 5.5          | C-H $\cdots$ Cl             |
| tH12  | G    | $x,y,z$            | -2.57            | 5.0          | non-specific                |
| tH13  | A    | $1+x,y,z$          | 1.23             | -2.4         | non-specific                |
|       |      | Total              | -44.82           |              |                             |
